# Supplementary material
Source: PubMed Central journal article supplement (PMC10190267)
Supplement: aac.00078-23-s0001.pdf [file aac.00078-23-s0001.pdf]

## Supplementary data

**Table S1.** Oligonucleotide sequences used in this study

| Primer | Sequence                                                    | Target genes                |
|--------|-------------------------------------------------------------|-----------------------------|
| IMI    | forward: 5'- GATGAT <u>GAGCTC</u> GGTAAAACCATGTCACTTAATG-3' | <i>bla</i> <sub>IMI-1</sub> |
|        | reverse: 5'- GATGATGGATCCAAGTGATGGCTACAGTTAAG-3'            |                             |
| SME    | forward: 5'- GATGAT <u>GAGCTC</u> CCTCCGTTAGTAATGAAGCTC-3'  | <i>bla</i> <sub>SME-1</sub> |
|        | reverse: 5'- GATGATGGATCCCGCCTCTTTAAACAAGAGACG-3'           |                             |
| NmcA   | forward: 5'- GATGAT <u>GAGCTC</u> CCTGTATAATCGCTCGCTG-3'    | <i>bla</i> <sub>NmcA</sub>  |
|        | reverse: 5'- GATGATGGATCCCACACTGAGCATATGCTGAC-3'            |                             |
| FRI    | forward: 5'- GATGAT <u>GAGCTC</u> CAATTCTCCATGGGTATATGC-3'  | <i>bla</i> <sub>FRI-1</sub> |
|        | reverse: 5'- GATGATGGATCCCTGAAGGTTGTATCTAATCTTG-3'          |                             |

\_\_\_: Underline text corresponds to restriction sites. GAGCTC → SacI and GGATCC → BamHI.
